# Supplementary material for: Photophysical, electrochemical properties and flexible organic solar cell application of 7,7-bis(1-cyclopropyl carbonyl piperazino)-8,8 dicyanoquinodimethane
Source: Royal Society of Chemistry journal article supplement (doi:10.1039/d1ma00778e), 2022-01-01
Supplement: d1ma00778e1.pdf [file d1ma00778e1.pdf]

*Electronic Supplementary Information*

# Photophysical, electrochemical properties and flexible organic solar cell application of 7,7-bis(1-cyclopropyl carbonyl piperazino)-8,8 dicyanoquinodimethane

Anwarhussaini Syed,<sup>a</sup> Renuka H,<sup>b</sup> Anuradha Mohitkar,<sup>a</sup> Raghavaiah Pallepogu,<sup>c</sup> Mahadev Karthik Challa,<sup>a</sup> Sanket Goel,<sup>b</sup> Subbalakshmi Jayanty<sup>a\*</sup>

|                                                                                                                                            |         |
|--------------------------------------------------------------------------------------------------------------------------------------------|---------|
| <b>Fig. S1a</b> <sup>1</sup> H NMR of BCCPDQ.                                                                                              | S2      |
| <b>Fig. S1b</b> <sup>13</sup> C NMR of BCCPDQ.                                                                                             | S2      |
| <b>Fig. S1 c</b> Mass spectrum of BCCPDQ                                                                                                   | S3      |
| <b>Fig. S2</b> ORTEP molecular diagram                                                                                                     | S3      |
| <b>Table S1</b> Basic crystallographic data of BCCPDQ.                                                                                     | S4      |
| <b>Table S2-S6.</b> Detailed crystallographic tables                                                                                       | S5-S9   |
| <b>Fig. S3</b> (a) Extensive H-bonding network and (b) Supramolecular assemblies                                                           | S9      |
| <b>Table S7.</b> Significant non-covalent intermolecular interactions (Å)                                                                  | S10     |
| <b>Table S8.</b> Absorption, emission stoke shift table and quantum yields                                                                 | S10     |
| <b>Table S9.</b> Shows the viscosity data of the solvents considered in this study.                                                        | S11     |
| <b>Fig. S4</b> Variable temperature (from 0 to 30 °C) emission spectra in isopropanol (IPA)                                                | S11     |
| <b>Fig. S5</b> Viscosity study in glycerol-water mixture                                                                                   | S12     |
| <b>Fig S6.</b> Decrease in the emission intensity on adding water to the DMF solution of BCCPDQ indicate aggregation quenching phenomenon. | S12     |
| <b>Fig. S7</b> Fluorescence lifetime decay                                                                                                 | S13     |
| <b>Table S10.</b> Lifetime decay pattern of BCCPDQ                                                                                         | S13     |
| <b>Fig. S8</b> Scanning electron microscopy images of the drop casted films                                                                | S14     |
| <b>Table S11.</b> A comparative table representing the efficiencies in small molecules based solar cells                                   | S14-S15 |

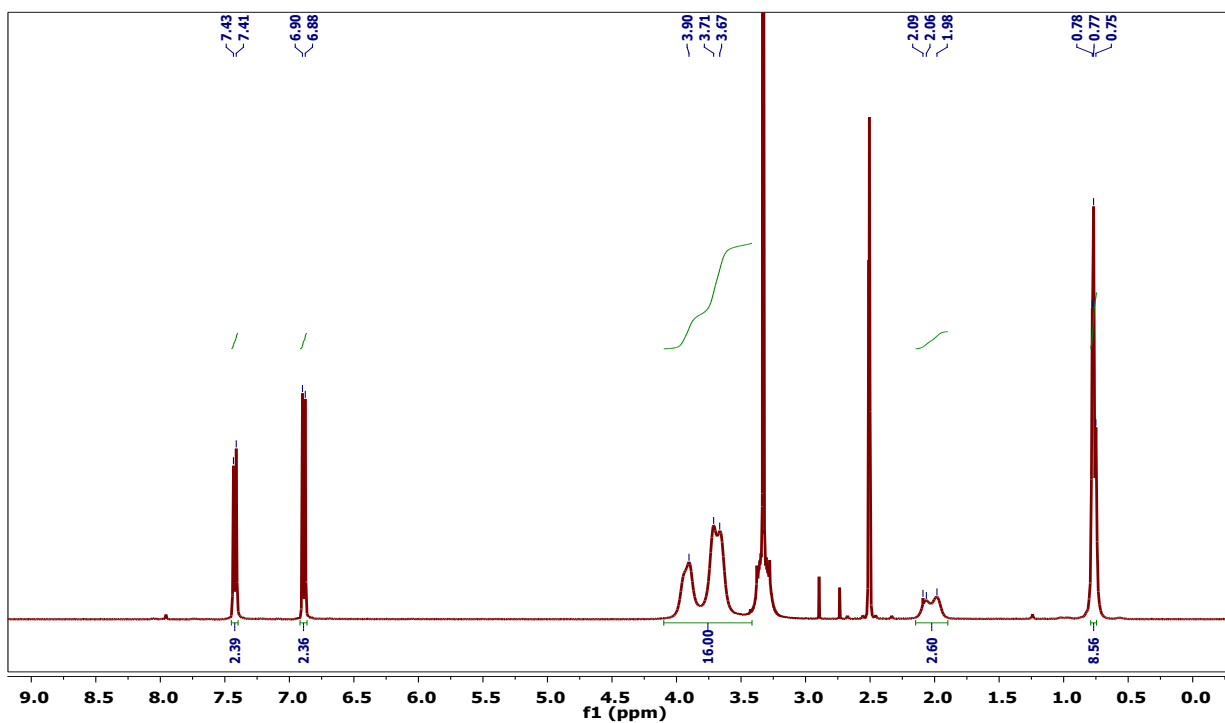

Fig. S1a <sup>1</sup>H NMR of BCCPDQ.

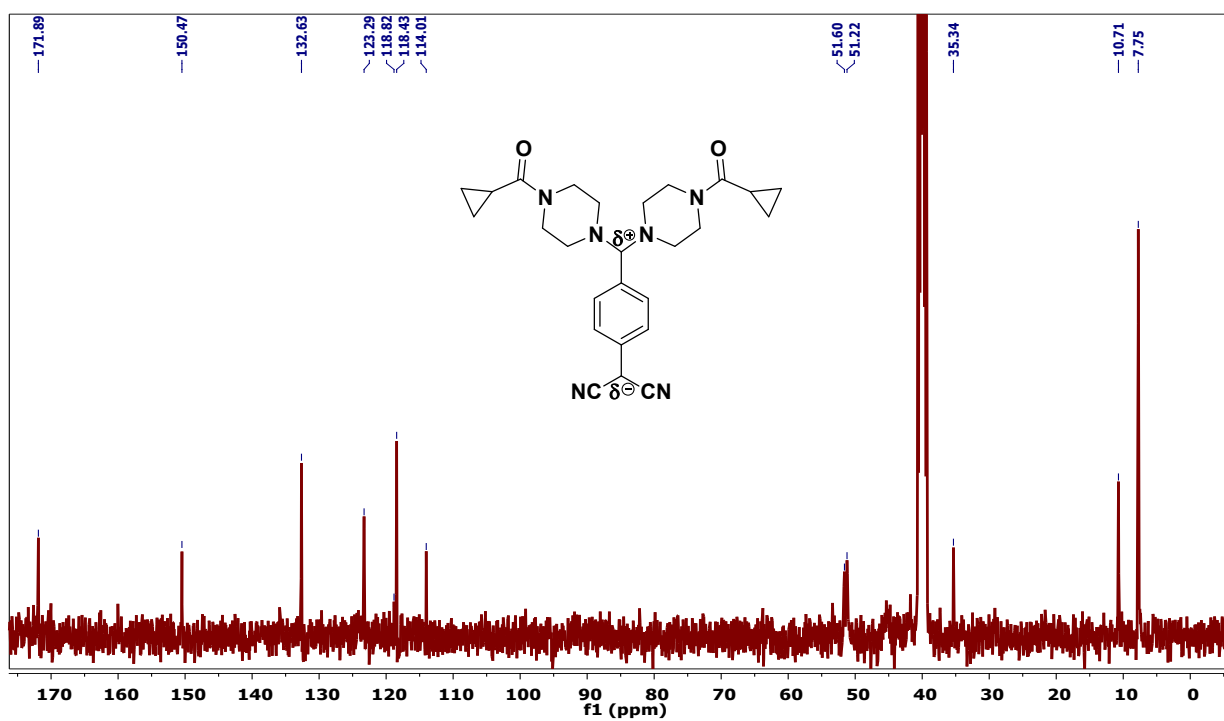

Fig. S1b <sup>13</sup>C NMR of BCCPDQ.

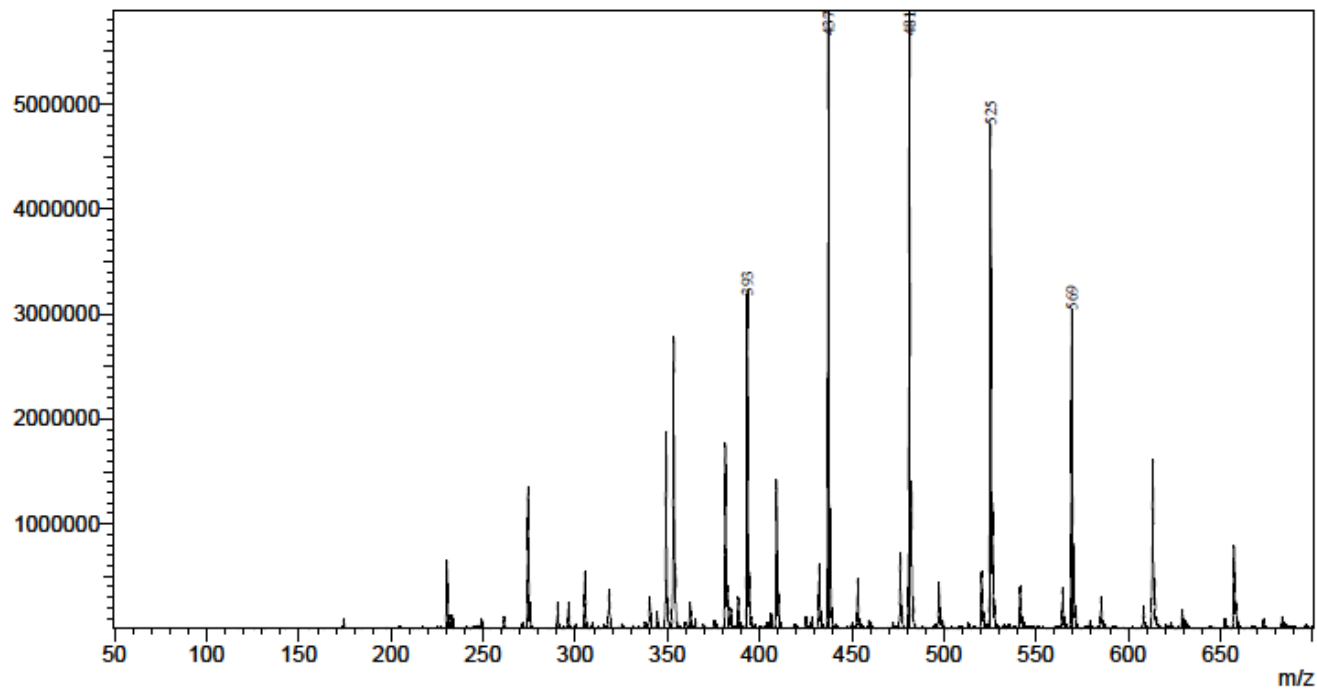

**Fig. S1c** Mass spectrum of BCCPDQ.

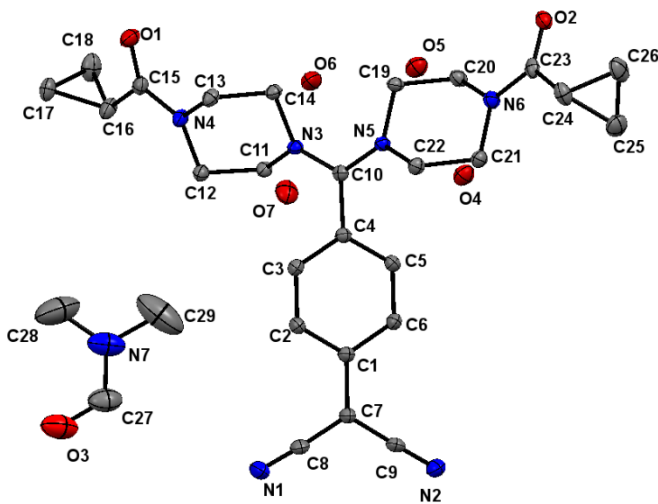

**Fig. S2** ORTEP molecular diagram with 50% probability thermal ellipsoids. H-atoms omitted for clarity.

**Table S1** Basic crystallographic data of BCCPDQ.

|          |        |
|----------|--------|
| Compound | BCCPDQ |
|----------|--------|

**Table**  
Atomic  
(×104)

**S2.**

|                                             |                                                               |              |                                                        |                                  |
|---------------------------------------------|---------------------------------------------------------------|--------------|--------------------------------------------------------|----------------------------------|
| Empirical formula                           | C <sub>29</sub> H <sub>45</sub> N <sub>7</sub> O <sub>7</sub> |              |                                                        | Fractional<br>Coordinates<br>and |
| Formula weight                              | 603.72                                                        |              |                                                        |                                  |
| Temperature/K                               | 293(2)                                                        |              |                                                        |                                  |
| Crystal system                              | x                                                             | triclinic    | z                                                      |                                  |
| Space group                                 | 13369.3(14)                                                   | 4194.9(8)    | 4541.5(7)                                              | 24.6(2)                          |
| a/Å, b/Å, c/Å                               | 5032.5(13)                                                    | 1117.804(7)  | 13.6400(3)                                             | 15.8558(4)                       |
| α/°, β/°, γ/°                               | 10694(2)                                                      | 5793.700(19) | 841267.2(8)                                            | 76.169(2)                        |
| Volume/Å <sup>3</sup>                       | 10184.9(19)                                                   | 9116.0(7)    | -2025.7(8)                                             | 25.8(3)                          |
| Z                                           | 10725.3(14)                                                   | 6903.8(8)    | 2862.1(7)                                              | 14.2(2)                          |
| ρ <sub>calc</sub> /cm <sup>3</sup>          | 12709.4(15)                                                   | 4981.20(9)   | 3325.3(7)                                              | 18.1(2)                          |
| μ/mm <sup>-1</sup>                          | 8278.1(14)                                                    | 8200.8(8)    | 2909.7(7)                                              | 14.5(2)                          |
| R(σ)                                        | 6104.5(15)                                                    | 10164.7(9)   | 3545.3(7)                                              | 18.7(2)                          |
| Crystal size/mm                             | 1088.3(18)                                                    | 7537.5(10)   | 109.32 × 0.28                                          | 9.4(8)                           |
| Radiation                                   | 10185.0(19)                                                   | 6645.6(10)   | λ = 0.71073                                            | (9)                              |
| 2θ range for data collection/°              | 6669.9(18)                                                    | 7508.2(10)   | 52.744                                                 | 1080.8(8)                        |
| Index ranges                                | 9726.5(17)                                                    | 7588.4(10)   | -9, -15 ≤ h ≤ 9, -19 ≤ l ≤ 19                          | 13.0(3)                          |
| Reflections collected                       | 8613.6(18)                                                    | 8480.0(10)   | 1080.4(8)                                              | 16.4(3)                          |
| Independent reflections                     | 9793.4(19)                                                    | 8457.6(10)   | R <sub>int</sub> = 0.0515, R <sub>sigma</sub> = 0.0095 | 18.1(3)                          |
| Data/restraints/parameters                  | 10283.7(19)                                                   | 7503.8(10)   | -1180.6(9)                                             | 18.8(3)                          |
| Goodness-of-fit on F <sup>2</sup>           | 10323(2)                                                      | 6577.3(11)   | -1619.7(9)                                             | 20.7(3)                          |
| Final R indexes [I > 2σ(I)]                 | 10228.4(19)                                                   | 8383.1(11)   | R <sub>1</sub> = 0.0455, wR <sub>2</sub> = 0.1229      | 19.1(3)                          |
| Final R indexes [all data]                  | 9563.5(17)                                                    | 7595.3(10)   | R <sub>1</sub> = 0.0480, wR <sub>2</sub> = 0.1250      | 14.1(3)                          |
| Largest diff. peak/hole / e Å <sup>-3</sup> | 12579.8(17)                                                   | 6511.6(10)   | 0.88 / -0.39                                           | 15.7(3)                          |
| CCDC                                        | 2017949                                                       |              |                                                        |                                  |
| C12                                         | 13100.2(18)                                                   | 5355.6(10)   | 2481.1(9)                                              | 18.3(3)                          |
| C13                                         | 10850.6(18)                                                   | 5357.8(10)   | 3657.4(9)                                              | 18.1(3)                          |
| C14                                         | 10332.3(17)                                                   | 6510.4(10)   | 3710.3(8)                                              | 16.0(3)                          |
| C15                                         | 13874.1(19)                                                   | 4397.0(10)   | 3810.8(9)                                              | 18.6(3)                          |
| C16                                         | 15738.3(19)                                                   | 3985.6(11)   | 3441.0(10)                                             | 23.9(3)                          |
| C17                                         | 16694(2)                                                      | 2962.7(11)   | 3746.4(10)                                             | 24.0(3)                          |
| C18                                         | 17182(2)                                                      | 3887.3(12)   | 4027.1(12)                                             | 30.4(4)                          |
| C19                                         | 8355.3(17)                                                    | 8615.6(10)   | 3786.1(8)                                              | 16.3(3)                          |
| C20                                         | 7842.1(18)                                                    | 9767.4(10)   | 3847.4(9)                                              | 18.9(3)                          |
| C21                                         | 6023.4(18)                                                    | 9839.4(10)   | 2674.2(9)                                              | 18.3(3)                          |
| C22                                         | 6536.2(17)                                                    | 8688.5(10)   | 2598.3(9)                                              | 16.8(3)                          |
| C23                                         | 4803.4(18)                                                    | 10824.6(10)  | 4026.4(9)                                              | 17.9(3)                          |
| C24                                         | 3057.6(19)                                                    | 11166.0(11)  | 3664.7(10)                                             | 23.2(3)                          |
| C25                                         | 2738(2)                                                       | 12112.6(13)  | 3160.6(11)                                             | 30.8(4)                          |
| C26                                         | 1787(2)                                                       | 12116.4(13)  | 4017.4(11)                                             | 32.0(4)                          |
| O3                                          | 5725(2)                                                       | 1392.4(15)   | -1012.9(10)                                            | 59.2(4)                          |
| N7                                          | 4918(2)                                                       | 2302.7(17)   | 206.9(11)                                              | 51.6(5)                          |
| C27                                         | 5123(3)                                                       | 2230(2)      | -631.3(13)                                             | 48.3(5)                          |
| C28                                         | 5339(4)                                                       | 1456(3)      | 733.4(18)                                              | 86.1(10)                         |
| C29                                         | 4259(4)                                                       | 3290(3)      | 631(2)                                                 | 96.4(12)                         |
| O4                                          | 2201.3(15)                                                    | 9048.2(9)    | 2545.6(7)                                              | 26.6(2)                          |
| O5                                          | 2711.9(15)                                                    | 8343.2(9)    | 4180.0(7)                                              | 27.6(2)                          |
| O6                                          | 5671.0(19)                                                    | 6672.8(10)   | 3972.5(7)                                              | 36.4(3)                          |
| O7                                          | 6815.2(16)                                                    | 6197.6(9)    | 2298.5(8)                                              | 32.9(3)                          |

Equivalent Isotropic Displacement Parameters ( $\text{\AA}^2 \times 10^3$ ) for exp\_309.  $U_{eq}$  is defined as 1/3 of the trace of the orthogonalised UIJ tensor.

**Table S3.** Anisotropic Displacement Parameters ( $\text{\AA}^2 \times 10^3$ ) for exp\_309. The Anisotropic displacement factor exponent takes the form:  $-2\pi^2[h^2a^2U_{11}+2hka^*b^*U_{12}+\dots]$ .

| Atom | U11     | U22     | U33     | U23     | U13     | U12     |
|------|---------|---------|---------|---------|---------|---------|
| O1   | 24.5(5) | 27.0(5) | 20.3(5) | 6.1(4)  | -3.5(4) | -2.1(4) |
| O2   | 22.3(5) | 17.7(5) | 21.1(5) | -2.4(4) | 2.3(4)  | -2.9(4) |
| N1   | 47.9(9) | 22.5(7) | 19.4(6) | -3.3(5) | 0.6(6)  | -7.4(6) |

|     |          |          |          |          |           |           |
|-----|----------|----------|----------|----------|-----------|-----------|
| N2  | 37.3(7)  | 22.0(6)  | 18.7(6)  | 3.2(5)   | -3.6(5)   | -8.1(5)   |
| N3  | 13.8(5)  | 15.6(5)  | 12.4(5)  | 1.1(4)   | -0.2(4)   | -2.3(4)   |
| N4  | 17.2(6)  | 16.9(5)  | 18.8(6)  | 4.3(4)   | -0.8(4)   | -1.8(4)   |
| N5  | 13.6(5)  | 16.6(5)  | 12.5(5)  | -0.3(4)  | -2.3(4)   | -1.8(4)   |
| N6  | 16.6(6)  | 18.4(6)  | 18.9(6)  | -1.5(4)  | -2.0(4)   | 0.3(4)    |
| C1  | 19.1(6)  | 17.7(6)  | 12.8(6)  | 0.0(5)   | -2.0(5)   | -4.5(5)   |
| C2  | 23.1(7)  | 14.6(6)  | 15.7(6)  | -1.7(5)  | -1.4(5)   | -3.7(5)   |
| C3  | 19.4(6)  | 14.7(6)  | 15.6(6)  | 1.9(5)   | -1.6(5)   | -3.7(5)   |
| C4  | 15.0(6)  | 16.7(6)  | 13.2(6)  | 0.4(5)   | -1.9(5)   | -3.2(5)   |
| C5  | 19.4(6)  | 14.6(6)  | 15.2(6)  | -1.4(5)  | -2.2(5)   | -3.9(5)   |
| C6  | 24.5(7)  | 14.5(6)  | 15.8(6)  | 2.2(5)   | -3.1(5)   | -5.1(5)   |
| C7  | 26.2(7)  | 16.4(6)  | 13.3(6)  | 0.1(5)   | -1.7(5)   | -4.5(5)   |
| C8  | 27.5(7)  | 21.7(7)  | 12.3(6)  | 1.7(5)   | -0.7(5)   | -5.3(6)   |
| C9  | 23.6(7)  | 21.5(7)  | 12.0(6)  | -2.5(5)  | -1.9(5)   | -5.1(5)   |
| C10 | 14.2(6)  | 14.8(6)  | 14.3(6)  | 0.4(5)   | -1.5(5)   | -5.4(5)   |
| C11 | 13.5(6)  | 17.0(6)  | 15.4(6)  | 1.9(5)   | 0.3(5)    | -1.9(5)   |
| C12 | 18.9(6)  | 17.5(6)  | 16.4(6)  | 1.8(5)   | -0.5(5)   | -0.6(5)   |
| C13 | 16.3(6)  | 19.1(7)  | 18.7(6)  | 4.6(5)   | -1.2(5)   | -4.2(5)   |
| C14 | 15.5(6)  | 19.0(6)  | 12.7(6)  | 2.3(5)   | -0.5(5)   | -2.6(5)   |
| C15 | 20.7(7)  | 13.9(6)  | 21.7(7)  | 1.8(5)   | -4.3(5)   | -3.9(5)   |
| C16 | 20.4(7)  | 21.3(7)  | 27.9(8)  | 9.0(6)   | -2.0(6)   | -1.1(6)   |
| C17 | 20.4(7)  | 17.7(7)  | 32.2(8)  | 4.2(6)   | -4.4(6)   | -0.3(5)   |
| C18 | 20.6(7)  | 24.5(8)  | 47.5(10) | 2.7(7)   | -9.7(7)   | -5.8(6)   |
| C19 | 15.8(6)  | 19.7(7)  | 11.9(6)  | -1.1(5)  | -1.1(5)   | -1.3(5)   |
| C20 | 16.6(6)  | 20.3(7)  | 18.1(6)  | -3.5(5)  | -2.1(5)   | -1.0(5)   |
| C21 | 17.1(6)  | 18.4(7)  | 18.0(7)  | 1.0(5)   | -3.8(5)   | -0.9(5)   |
| C22 | 13.2(6)  | 19.1(6)  | 17.4(6)  | 0.3(5)   | -3.5(5)   | -1.8(5)   |
| C23 | 17.6(6)  | 11.7(6)  | 24.1(7)  | 2.0(5)   | 1.7(5)    | -4.7(5)   |
| C24 | 17.4(7)  | 19.3(7)  | 32.3(8)  | -6.2(6)  | -2.4(6)   | -2.9(5)   |
| C25 | 32.9(8)  | 28.3(8)  | 31.1(8)  | 2.8(6)   | -13.9(7)  | -3.0(7)   |
| C26 | 23.3(8)  | 28.5(8)  | 38.3(9)  | -8.5(7)  | -7.9(7)   | 7.3(6)    |
| O3  | 45.7(9)  | 90.6(13) | 35.8(8)  | -8.4(8)  | -7.1(6)   | -4.5(8)   |
| N7  | 37.3(9)  | 86.6(14) | 32.5(9)  | -7.8(9)  | -1.4(7)   | -18.9(9)  |
| C27 | 37.0(10) | 73.3(15) | 33.1(10) | 0.8(10)  | 1.5(8)    | -12.3(10) |
| C28 | 72.5(19) | 135(3)   | 47.0(15) | 27.2(17) | -12.9(13) | -14.9(19) |
| C29 | 68.0(19) | 121(3)   | 100(2)   | -64(2)   | 23.3(17)  | -35.0(19) |
| O4  | 25.7(6)  | 28.5(6)  | 26.0(6)  | 4.0(5)   | -8.0(4)   | -5.1(5)   |
| O5  | 27.1(6)  | 30.6(6)  | 26.1(6)  | 3.1(5)   | -7.6(4)   | -6.9(5)   |
| O6  | 47.1(8)  | 32.4(6)  | 21.5(6)  | 1.3(5)   | -7.9(5)   | 8.3(6)    |
| O7  | 27.9(6)  | 32.0(6)  | 34.5(6)  | 0.9(5)   | 8.7(5)    | -3.5(5)   |

**Table S4.** Bond Lengths for BCCPDQ.

| Atom | Atom | Length/Å   | Atom | Atom | Length/Å   |
|------|------|------------|------|------|------------|
| O1   | C15  | 1.2381(18) | C4   | C5   | 1.4025(18) |

|    |     |            |     |     |            |
|----|-----|------------|-----|-----|------------|
| O2 | C23 | 1.2354(18) | C4  | C10 | 1.4746(17) |
| N1 | C8  | 1.157(2)   | C5  | C6  | 1.3814(19) |
| N2 | C9  | 1.159(2)   | C7  | C8  | 1.406(2)   |
| N3 | C10 | 1.3412(17) | C7  | C9  | 1.4045(19) |
| N3 | C11 | 1.4730(16) | C11 | C12 | 1.5285(18) |
| N3 | C14 | 1.4777(16) | C13 | C14 | 1.5247(18) |
| N4 | C12 | 1.4614(17) | C15 | C16 | 1.488(2)   |
| N4 | C13 | 1.4619(17) | C16 | C17 | 1.5182(19) |
| N4 | C15 | 1.3578(18) | C16 | C18 | 1.513(2)   |
| N5 | C10 | 1.3327(17) | C17 | C18 | 1.481(2)   |
| N5 | C19 | 1.4753(16) | C19 | C20 | 1.5241(19) |
| N5 | C22 | 1.4743(16) | C21 | C22 | 1.5239(18) |
| N6 | C20 | 1.4626(17) | C23 | C24 | 1.501(2)   |
| N6 | C21 | 1.4632(17) | C24 | C25 | 1.499(2)   |
| N6 | C23 | 1.3534(18) | C24 | C26 | 1.500(2)   |
| C1 | C2  | 1.4091(19) | C25 | C26 | 1.481(3)   |
| C1 | C6  | 1.4128(19) | O3  | C27 | 1.256(3)   |
| C1 | C7  | 1.4530(18) | N7  | C27 | 1.324(3)   |
| C2 | C3  | 1.3828(19) | N7  | C28 | 1.416(4)   |
| C3 | C4  | 1.4017(19) | N7  | C29 | 1.458(4)   |

**Table S5.** Bond Angles for BCCPDQ.

| Atom | Atom | Atom | Angle/°    | Atom | Atom | Atom | Angle/°    |
|------|------|------|------------|------|------|------|------------|
| C10  | N3   | C11  | 122.41(11) | N5   | C10  | C4   | 120.14(11) |
| C10  | N3   | C14  | 124.29(11) | N3   | C11  | C12  | 111.52(11) |
| C11  | N3   | C14  | 113.18(10) | N4   | C12  | C11  | 109.58(11) |
| C12  | N4   | C13  | 112.44(11) | N4   | C13  | C14  | 111.32(11) |
| C15  | N4   | C12  | 127.28(12) | N3   | C14  | C13  | 108.66(11) |
| C15  | N4   | C13  | 120.18(11) | O1   | C15  | N4   | 120.02(13) |
| C10  | N5   | C19  | 124.27(11) | O1   | C15  | C16  | 121.06(13) |
| C10  | N5   | C22  | 122.53(11) | N4   | C15  | C16  | 118.91(12) |
| C22  | N5   | C19  | 112.84(10) | C15  | C16  | C17  | 116.97(12) |
| C20  | N6   | C21  | 112.89(11) | C15  | C16  | C18  | 117.53(14) |
| C23  | N6   | C20  | 121.03(12) | C18  | C16  | C17  | 58.50(10)  |
| C23  | N6   | C21  | 125.89(12) | C18  | C17  | C16  | 60.56(10)  |
| C2   | C1   | C6   | 117.55(12) | C17  | C18  | C16  | 60.93(10)  |
| C2   | C1   | C7   | 120.80(12) | N5   | C19  | C20  | 109.68(11) |
| C6   | C1   | C7   | 121.65(12) | N6   | C20  | C19  | 110.75(11) |
| C3   | C2   | C1   | 121.20(12) | N6   | C21  | C22  | 110.08(11) |
| C2   | C3   | C4   | 120.78(12) | N5   | C22  | C21  | 110.81(11) |
| C3   | C4   | C5   | 118.53(12) | O2   | C23  | N6   | 122.03(13) |
| C3   | C4   | C10  | 119.98(12) | O2   | C23  | C24  | 121.28(12) |
| C5   | C4   | C10  | 121.49(12) | N6   | C23  | C24  | 116.68(12) |
| C6   | C5   | C4   | 120.80(12) | C25  | C24  | C23  | 118.45(13) |
| C5   | C6   | C1   | 121.14(12) | C25  | C24  | C26  | 59.20(11)  |
| C8   | C7   | C1   | 119.98(12) | C26  | C24  | C23  | 118.68(13) |



|    |     |    |            |     |     |     |           |
|----|-----|----|------------|-----|-----|-----|-----------|
| C9 | C7  | C1 | 121.47(12) | C26 | C25 | C24 | 60.44(10) |
| C9 | C7  | C8 | 118.55(12) | C25 | C26 | C24 | 60.36(11) |
| N1 | C8  | C7 | 176.51(15) | C27 | N7  | C28 | 123.1(2)  |
| N2 | C9  | C7 | 178.65(15) | C27 | N7  | C29 | 120.1(3)  |
| N3 | C10 | C4 | 118.74(11) | C28 | N7  | C29 | 116.8(3)  |
| N5 | C10 | N3 | 121.12(12) | O3  | C27 | N7  | 121.4(2)  |

**Table S6.** Hydrogen Atom Coordinates ( $\text{\AA}\times 104$ ) and Isotropic Displacement Parameters ( $\text{\AA}^2\times 103$ ) for BCCPDQ.

| Atom | x     | y     | z    | U(eq) |
|------|-------|-------|------|-------|
| H2   | 10372 | 6029  | -85  | 22    |
| H3   | 10074 | 6071  | 1373 | 20    |
| H5   | 9420  | 9095  | 1372 | 20    |
| H6   | 9718  | 9059  | -85  | 22    |
| H11A | 13357 | 6764  | 2843 | 19    |
| H11B | 12734 | 6756  | 1933 | 19    |
| H12A | 12444 | 5099  | 2080 | 22    |
| H12B | 14356 | 5119  | 2298 | 22    |
| H13A | 10658 | 5092  | 4217 | 22    |
| H13B | 10101 | 5121  | 3292 | 22    |
| H14A | 9078  | 6745  | 3897 | 19    |
| H14B | 10997 | 6753  | 4116 | 19    |
| H16  | 16036 | 4143  | 2849 | 29    |
| H17A | 16042 | 2627  | 4160 | 29    |
| H17B | 17527 | 2513  | 3340 | 29    |
| H18A | 18314 | 3999  | 3792 | 36    |
| H18B | 16830 | 4114  | 4612 | 36    |
| H19A | 9546  | 8366  | 3948 | 20    |
| H19B | 7549  | 8344  | 4172 | 20    |
| H20A | 7811  | 9986  | 4432 | 23    |
| H20B | 8727  | 10035 | 3510 | 23    |
| H21A | 6827  | 10117 | 2291 | 22    |
| H21B | 4831  | 10091 | 2516 | 22    |
| H22A | 5644  | 8417  | 2925 | 20    |
| H22B | 6581  | 8481  | 2010 | 20    |
| H24  | 2526  | 10630 | 3480 | 28    |
| H25A | 3675  | 12472 | 3091 | 37    |
| H25B | 2060  | 12134 | 2678 | 37    |
| H26A | 529   | 12140 | 4057 | 38    |
| H26B | 2144  | 12478 | 4470 | 38    |
| H27  | 4814  | 2813  | -945 | 58    |
| H28A | 5927  | 868   | 392  | 129   |
| H28B | 4268  | 1346  | 1029 | 129   |

|      |          |          |          |       |
|------|----------|----------|----------|-------|
| H28C | 6106     | 1581     | 1137     | 129   |
| H29A | 5161     | 3436     | 946      | 145   |
| H29B | 3224     | 3283     | 1011     | 145   |
| H29C | 3959     | 3799     | 216      | 145   |
| H4A  | 2903     | 8875     | 2097     | 40    |
| H4B  | 1420(30) | 9593(19) | 2424(15) | 51(7) |
| H5A  | 3272     | 8664     | 4468     | 41    |
| H5B  | 2647     | 8644     | 3710     | 41    |
| H6A  | 5888     | 6357     | 4427     | 55    |
| H6B  | 4710(40) | 7160(20) | 4082(17) | 59(7) |
| H7A  | 7554     | 5628     | 2215     | 49    |
| H7B  | 6524     | 6303     | 2827     | 49    |

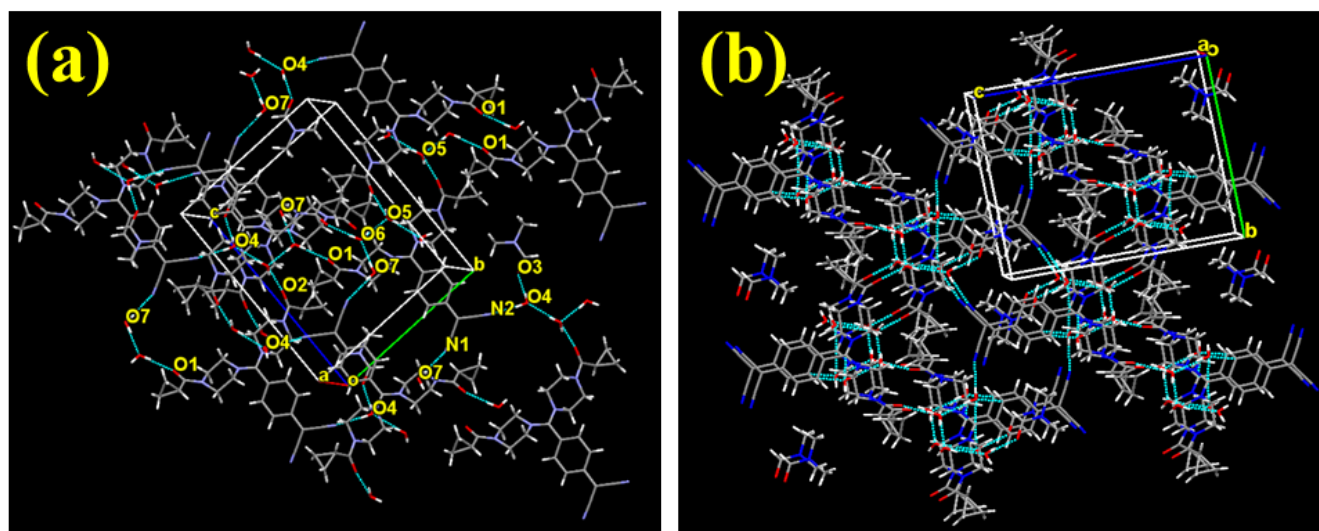

**Fig. S3** (a) Extensive H-bonding network among the molecular dipoles of BCCPDQ manifested through the surrounding water and DMF molecules (b) Supramolecular assemblies of molecular dipoles with extensive short contacts.

**Table S7.** Significant non-covalent intermolecular interactions (Å) and hydrogen bond type ranging from weak, moderate to strong leading to the orientations of molecular dipoles consequently resulting in solid-state fluorescence.

| Interaction    | C---O-H                          | N---H-C                          | N---O-H        | O---O-H                                            | H---O-C | C---H-C                 | O---H-C                                                      | H---H-C/H---H-O         | N---H-O        | O---H-O                          |
|----------------|----------------------------------|----------------------------------|----------------|----------------------------------------------------|---------|-------------------------|--------------------------------------------------------------|-------------------------|----------------|----------------------------------|
| H-bond         |                                  | 2.647<br>2.722<br>2.746<br>2.743 | 2.908<br>2.953 | 2.795<br>2.726<br>2.765<br>2.794<br>2.821<br>2.742 |         |                         | 2.477, 2.664<br>2.500, 2.529<br>2.676, 2.719<br>2.665, 2.669 |                         | 2.031<br>2.157 | 1.886<br>1.962<br>1.960<br>1.888 |
| Short contacts | 3.185<br>3.220<br>3.188<br>3.213 |                                  |                |                                                    | 2.547   | 2.892<br>2.869<br>2.723 |                                                              | 2.388<br>2.128<br>2.369 |                |                                  |

**Table S8.** Absorption, emission wavelengths, stoke shift table and quantum yields of BCCPDQ in both solution and solid states.

| S.No | Solvent      | Absorption maximum (nm) | Emission maximum (nm) | Stoke shift (nm) | QY (%)      |
|------|--------------|-------------------------|-----------------------|------------------|-------------|
| 1    | MeCN         | 430                     | 535                   | 105              | 0.13        |
| 2    | MeOH         | 423                     | 528                   | 105              | 0.16        |
| 3    | EtOH         | 432                     | 531                   | 99               | 0.2         |
| 4    | IPA          | 442                     | 525                   | 83               | 0.28        |
| 5    | DMF          | 431                     | 526                   | 95               | 0.21        |
| 6    | DMSO         | 425                     | 526                   | 101              | 0.34        |
| 7    | <b>SOLID</b> | <b>464</b>              | <b>528</b>            | <b>64</b>        | <b>9.82</b> |

**Table S9.** Shows the viscosity data of the solvents considered in this study.

| S.No. | Solvent                        | Viscosity in centipoise (cp) | Viscosity in centistokes (cst) | Relative polarity |
|-------|--------------------------------|------------------------------|--------------------------------|-------------------|
| 1     | Acetonitrile                   | 0.37                         | 0.47                           | 0.46              |
| 2     | Methanol                       | 0.54                         | 0.69                           | 0.762             |
| 3     | Ethanol                        | 1.07                         | 1.36                           | 0.654             |
| 4     | <i>i</i> -propyl alcohol (IPA) | <b>2.04</b>                  | <b>2.61</b>                    | <b>0.546</b>      |
| 5     | DMF                            | 0.79                         | 0.84                           | 0.386             |
| 6     | DMSO                           | 1.99                         | 1.82                           | 0.444             |

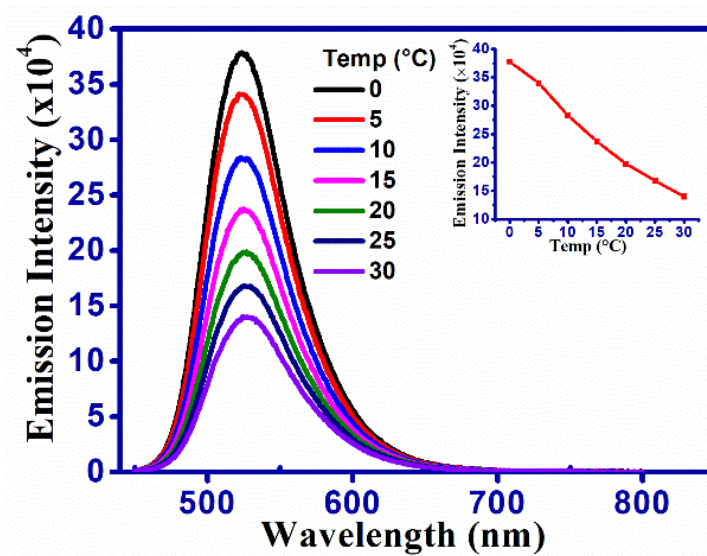

Fig. S4 Variable temperature emission spectra of BCCPDQ in isopropanol (IPA) from 0 to 30 °C.

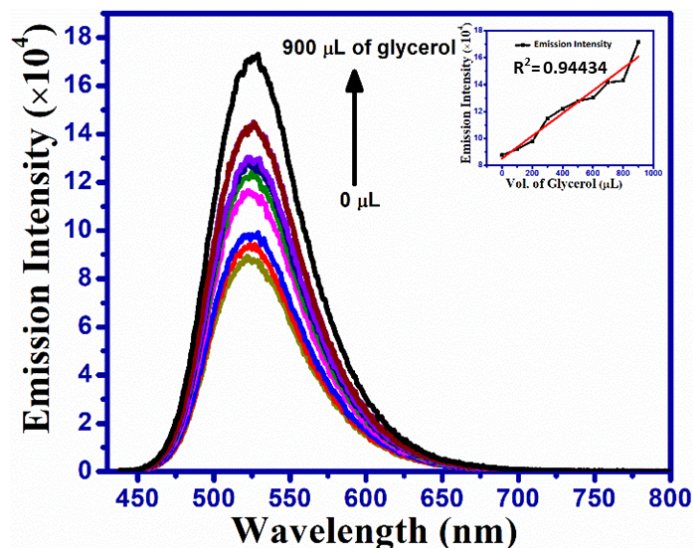

**Fig. S5** Viscosity study carried out in the 10 ppm of sample solution, considered in glycerol:water (1:1 volume ratio) mixture. Enhanced emission intensity observed on the gradual increment of 100  $\mu\text{L}$  of glycerol to the initial solutions.

0.5 mg of the BCCPDQ dissolved in a 1:1 volume ratio of glycerol and water mixture, sonicated for about 5 to 10 mins. This solution comprised of 100 ppm concentration, further diluted to 10 ppm and to this 10 ppm solution, at each instant 100  $\mu\text{L}$  of glycerol was added. Fluorescence enhancement noticed with increased amounts of glycerol added (Fig. S6).

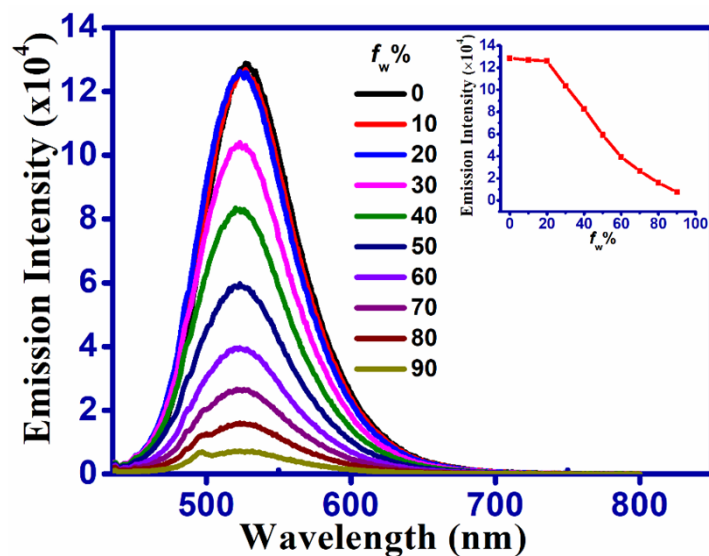

**Fig. S6** Decrease in the emission intensity on adding water from 0 to 90% to the 10 ppm DMF solution of BCCPDQ indicating aggregation quenching phenomenon.

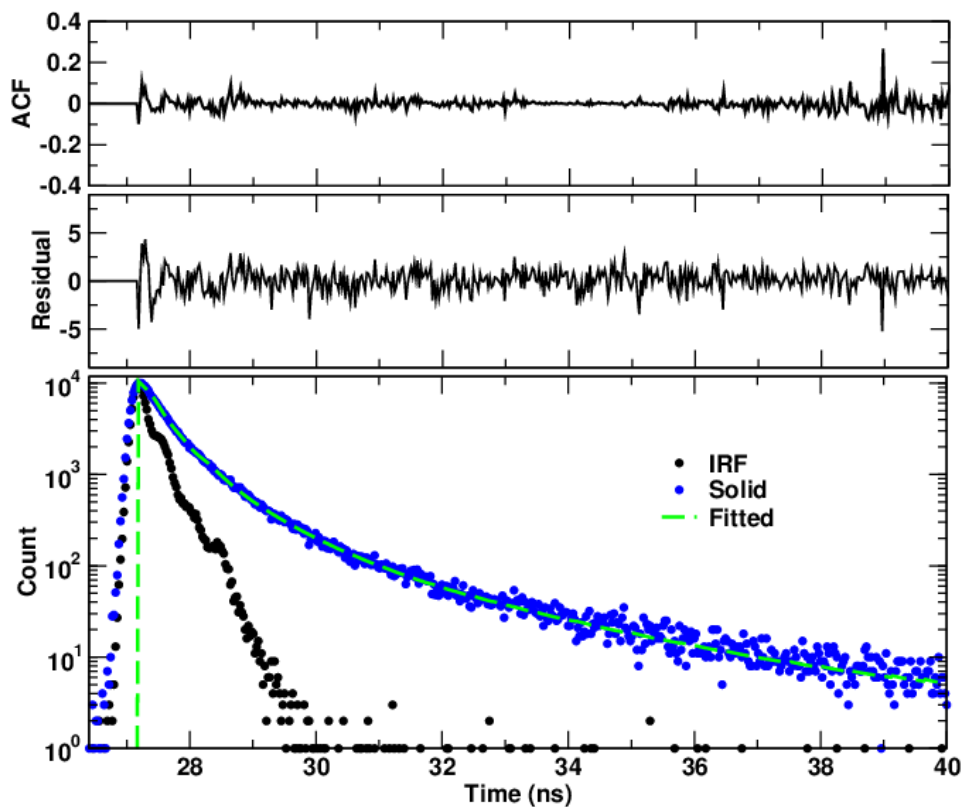

**Fig. S7** Shows fluorescence lifetime decay ( $\sim 0.26$  ns) for solid ( $\lambda_{\max \text{ exc}}$ : 464 nm and  $\lambda_{\max \text{ emi}}$ : 528 nm) along with the residual plot and autocorrelation function (ACF).

**Table S10.** Lifetime decay pattern of solid BCCPDQ,  $B_1$ ,  $B_2$  and  $B_3$  are relative contributions to  $\tau_1$ ,  $\tau_2$  and  $\tau_3$ .  $\langle \tau \rangle$  is average lifetime from multiple decay profiles.

| BCCPDQ<br>(Solid) | $\lambda_{\max \text{ exc}}$<br>(nm) | $\lambda_{\max \text{ em}}$<br>(nm) | $B_1$ | $B_2$ | $B_3$ | $\tau_1$ | $\tau_2$ | $\tau_3$ | $\langle \tau \rangle$<br>(ns) | $\chi^2$ | $K_r$<br>( $\text{ns}^{-1}$ ) | $K_{nr}$<br>( $\text{ns}^{-1}$ ) |
|-------------------|--------------------------------------|-------------------------------------|-------|-------|-------|----------|----------|----------|--------------------------------|----------|-------------------------------|----------------------------------|
|                   | 464                                  | 528                                 | 0.08  | 0.01  | 0.92  | 0.82     | 2.67     | 0.18     | 0.26                           | 1.34     | 0.377                         | 0.034                            |

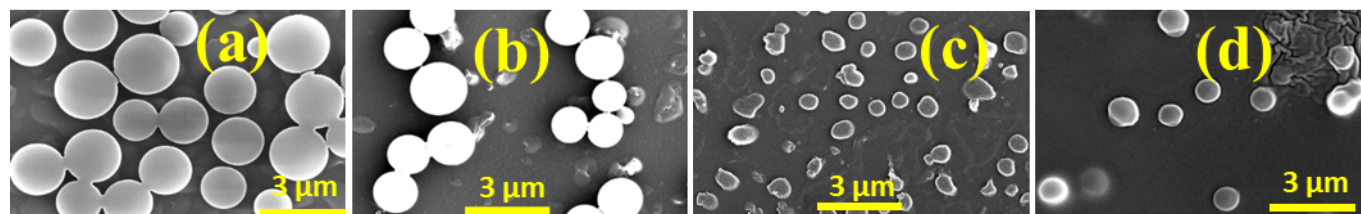

**Fig. S8** Scanning electron microscopy images of the drop casted films at 3  $\mu\text{m}$  magnification obtained from the solutions of (a) MeCN, (b) MeOH, (c) EtOH and (d) IPA.

**Table S11.** A comparative table representing the efficiencies of other recently developed small organic materials based solar cell applications.

| Device                                                  | Jsc (mA/cm <sup>2</sup> ) | Voc (V)    | PCE (%)     | Reference                                                                             |
|---------------------------------------------------------|---------------------------|------------|-------------|---------------------------------------------------------------------------------------|
| ITO/pentacene/CuPc/C60/BCP/Al                           | 3.58                      | 0.39       | 0.79        | [1]                                                                                   |
| ITO/MoO <sub>3</sub> /CuPc/C60/BCP/Al                   | 3.41                      | 0.39       | 0.72        | [1]                                                                                   |
| J52:IEICO with 12% TCNQ                                 | 0.51                      | 0.650      | 0.01        | TCNQ is applied as a volatilizable additive into the J52:IEICO-based active layer [2] |
| Al/chlorophyll-a/Hg                                     | --                        | --         | 0.001       | [3]                                                                                   |
| Pentacene/C60                                           | 8.8                       |            | 1.6         | [4]                                                                                   |
| SubPc/C60                                               | 3.36                      | 0.97       | 2.1         | [5]                                                                                   |
| DRTB-FT:F-2Cl                                           | 10.77                     | 1.098      | 5.65        | This is the as casted device [6]                                                      |
| ITO/PEDOT:PSS/SMPV1:PC71BM/Ca/Al                        | 11.4                      | 0.93       | 7.2         | [7]                                                                                   |
| <b>Al/BCCPDQ/ITO-PET</b>                                | <b>2.56</b>               | <b>0.5</b> | <b>0.40</b> | <b>Current work</b>                                                                   |
| <b>Al/BCCPDQ/TiO<sub>2</sub> NP<sub>s</sub>/ITO-PET</b> | <b>6.72</b>               | <b>1</b>   | <b>2.26</b> | <b>Current work</b>                                                                   |

## References

- [1] Huang, P.H., Huang, C.J., Chen, K.L., Ke, J.C., Wang, Y.H. and Kang, C.C., 2014. Improved reliability of small molecule organic solar cells by double anode buffer layers. *Journal of Nanomaterials*, 2014.
- [2] Yu, R., Yao, H., Hong, L., Gao, M., Ye, L. and Hou, J., 2020. TCNQ as a volatilizable morphology modulator enables enhanced performance in non-fullerene organic solar cells. *Journal of Materials Chemistry C*, 8(1), pp.44-49.
- [3] Tang, C.W. and Albrecht, A.C., 1975. Photovoltaic effects of metal–chlorophyll-a–metal sandwich cells. *The Journal of chemical physics*, 62(6), pp.2139-2149.
- [4] Pandey, A.K. and Nunzi, J.M., 2006. Efficient flexible and thermally stable pentacene/C 60 small molecule based organic solar cells. *Applied Physics Letters*, 89(21), p.213506.

- [5] Mutolo, K., E. Mayo, B. Rand, S. Forrest, and M. Thompson. 2006. Enhanced open-circuit voltage in subphthalocyanine=C60 organic photovoltaic cells. *Journal of the American Chemistry Association* 128(25):8108–8109
- [6] Liu, C., Qiu, N., Sun, Y., Ke, X., Zhang, H., Li, C., Wan, X. and Chen, Y., 2020. All-small-molecule organic solar cells based on a fluorinated small molecule donor with high open-circuit voltage of 1.07 V. *Frontiers in chemistry*, 8, p.329.
- [7] Liu, Y., Chen, C.C., Hong, Z., Gao, J., Yang, Y.M., Zhou, H., Dou, L., Li, G. and Yang, Y., 2013. Solution-processed small-molecule solar cells: breaking the 10% power conversion efficiency. *Scientific reports*, 3(1), pp.1-8.
